# Supplementary material for: UHRF1 Drives Hepatocellular Carcinoma Progression via Epigenetic Repression of SFMBT2
Source: Research Square preprint supplement (doi:10.21203/rs.3.rs-7981198/v1), 2025-12-04
Supplement: Supplementary file 1 [file a9d148b3b6449f21570ad393.xlsx]

## Sheet: Sheet1
			12 days			16 days			20 days			24 days			28 days			32 days
		number	length（mm）	width（mm）	volume（mm3）	length（mm）	width（mm）	volume（mm3）	length（mm）	width（mm）	volume（mm3）	length（mm）	width（mm）	volume（mm3）	length（mm）	width（mm）	volume（mm3）	length（mm）	width（mm）	volume（mm3）
		1	6.81	5.27	94.5667	7.7	6.48	161.663	8.04	7.43	221.924	9.84	8.92	391.467	10.54	9.67	492.792	11.62	10.32	618.779
		2	6.55	4.8	75.456	7.74	6.31	154.088	8.57	8.54	312.512	9.95	9.61	459.452	11.64	10.16	600.773	13.54	10.91	805.82
		3	6.27	5.68	101.143	7.37	6.64	162.47	9.2	7.04	227.983	11.49	8.19	385.352	13.82	8.66	518.22	15.33	9.51	693.223
		4	5.15	4.77	58.5887	6.42	5.48	96.3976	8.15	6.19	156.138	9.82	7.51	276.924	11.84	8.09	387.453	13.79	9.66	643.411
		5	5.83	5.61	91.7412	7.56	6.67	168.168	8.33	7.09	209.367	9.14	7.83	280.182	9.69	8.69	365.876	10.73	9.3	464.019
		6	5.71	5.3	80.1969	6.51	5.71	106.126	7.07	6.78	162.498	8.19	6.3	162.531	9.25	6.81	214.489	10.24	7.27	270.607
		average			83.6154			141.486			215.07			325.985			429.934			582.643
		1	7.91	6.54	169.162	8.73	7.64	254.783	10.63	9.37	466.641	12.81	10.96	769.379	13.17	12.33	1001.11	14.37	14.29	1467.21
		2	7.54	5.46	112.39	8.11	6.9	193.059	9.77	6.76	223.233	10.58	8.59	390.339	12.24	9.2	517.997	13.12	10.25	689.21
		3	6.9	6.62	151.194	7.64	7.1	192.566	9.83	7.7	291.41	11.61	9.66	541.697	13.2	10.23	690.709	15.03	11.02	912.625
		4	7.36	5.92	128.971	8.15	6.66	180.749	9.07	6.94	218.422	10.62	8.33	368.455	11.75	9.37	515.807	13.18	10.77	764.393
		5	9.53	6.63	209.455	10.66	7.24	279.386	13.92	7.92	436.576	15.52	8.83	605.039	18.71	9.77	892.962	20.73	10.25	1088.97
		6	8.32	5.37	119.962	10.03	6.07	184.777	11.34	6.03	206.166	12.64	7.39	345.148	14.86	8.24	504.479	16.77	9.54	763.132
		average			148.522			214.22			307.075			503.343			687.177			947.59
		1	6.71	6.19	128.551	8.12	6.62	177.927	9.61	7.95	303.688	10.85	9.33	472.24	11.15	10.38	600.675	13.5	11.67	919.275
		2	6.29	5.45	93.4144	8.37	7.41	229.79	9.18	8.16	305.628	10.71	8.78	412.808	11.74	10.31	623.958	13.39	11.08	821.921
		3	7.01	4.91	84.4989	8.91	5.35	127.513	10.7	5.92	187.498	11.12	6.01	200.828	12.77	6.67	284.062	13.08	7.96	414.385
		4	5.92	5.31	83.4605	6.75	5.56	104.333	7.8	6.21	150.4	8.96	7.09	225.201	9.33	8.24	316.742	10.63	9.48	477.661
		5	6.14	5.46	91.5216	7.05	5.45	104.701	7.93	6.52	168.554	9.7	6.51	205.543	10.79	7.48	301.852	11.4	8.21	384.203
		6	6.69	4.8	77.0688	7.73	4.44	76.1931	8.47	4.96	104.188	9.22	5.17	123.22	11.36	5.62	179.399	12.75	6.61	278.537
		average			93.0858			136.743			203.326			273.307			384.448			549.33
